# Supplementary material for: Origin and Composition of Ferromanganese Deposits of New Caledonia Exclusive Economic Zone
Source: MDPI journal article supplement (doi:10.3390/min12020255), 2022-02-16
Supplement: s1 [file s1]

**Table S1.** Normalised to 0% H<sub>2</sub>O<sup>-a</sup> XRF chemical compositions of 104 Fe-Mn mineralisation samples.

| Sample                         | 102D  | 105D  | 108D  | 109D  | 110D  | 113D  | 114D  | 116D  | 117D  | CP5069 | DN5064 | DN5079 | DN5080B | DN5085A | DR01A | DR04C | DR11Ai | DR06B | DR07B |
|--------------------------------|-------|-------|-------|-------|-------|-------|-------|-------|-------|--------|--------|--------|---------|---------|-------|-------|--------|-------|-------|
| H <sub>2</sub> O <sup>-a</sup> | -     | -     | -     | -     | 3,23  | 3,64  | 8,04  | 9,17  | 6,05  | 3,41   | 6,02   | 5,96   | 2,43    | 5,95    | 8,32  | 7,13  | 5,54   | 7,36  | 6,1   |
| LOI <sup>b</sup>               | -     | -     | -     | -     | 15,88 | 21,77 | 19,94 | 15,14 | 19,68 | 19,96  | 20,3   | 17,47  | 21,88   | 17,9    | 20,65 | 16,04 | 14,34  | 19,39 | 20,79 |
| Mn (%)                         | 15,42 | 16,04 | 15,52 | 12,57 | 13,82 | 18,00 | 12,79 | 14,77 | 20,05 | 21,95  | 23,16  | 19,85  | 21,29   | 15,62   | 22,38 | 16,49 | 14,24  | 15,13 | 25,04 |
| Fe                             | 20,69 | 21,06 | 21,87 | 22,46 | 19,71 | 22,77 | 20,44 | 21,85 | 22,27 | 14,94  | 18,98  | 18,00  | 17,93   | 13,95   | 19,66 | 22,34 | 20,75  | 22,82 | 18,48 |
| Fe/Mn                          | 1,34  | 1,31  | 1,41  | 1,79  | 1,43  | 1,27  | 1,60  | 1,48  | 1,11  | 0,68   | 0,82   | 0,91   | 0,84    | 0,89    | 0,88  | 1,35  | 1,46   | 1,51  | 0,74  |
| Si                             | 8,59  | 8,75  | 9,10  | 10,94 | 10,00 | 3,12  | 5,73  | 7,78  | 3,18  | 1,53   | 1,79   | 5,67   | 2,70    | 8,75    | 1,90  | 7,08  | 10,18  | 4,73  | 1,91  |
| Al                             | 2,08  | 1,74  | 1,58  | 2,27  | 2,22  | 0,84  | 2,29  | 2,21  | 0,83  | 0,95   | 0,99   | 2,04   | 1,21    | 2,48    | 0,79  | 1,56  | 2,00   | 1,58  | 0,57  |
| Si/Al                          | 4,13  | 5,02  | 5,75  | 4,82  | 4,50  | 3,71  | 2,50  | 3,52  | 3,83  | 1,61   | 1,81   | 2,78   | 2,23    | 3,53    | 2,41  | 4,54  | 5,09   | 2,99  | 3,35  |
| Mg                             | 1,13  | 1,08  | 1,05  | 1,08  | 1,06  | 1,31  | 1,49  | 1,25  | 1,25  | 1,68   | 1,59   | 1,51   | 1,43    | 3,92    | 1,53  | 1,09  | 1,05   | 2,06  | 1,27  |
| Na                             | 1,46  | 1,47  | 1,41  | 1,44  | 1,83  | 1,53  | 1,83  | 1,85  | 1,52  | 1,18   | 1,24   | 1,57   | 1,29    | 1,69    | 1,29  | 1,48  | 1,64   | 1,31  | 1,42  |
| Ca                             | 2,54  | 2,43  | 2,05  | 2,06  | 2,19  | 2,53  | 5,21  | 2,27  | 2,55  | 7,27   | 3,49   | 2,18   | 3,27    | 3,03    | 3,15  | 2,15  | 1,86   | 3,41  | 2,78  |
| K                              | 0,45  | 0,37  | 0,36  | 0,45  | 0,38  | 0,22  | 0,25  | 0,44  | 0,28  | 0,37   | 0,26   | 0,46   | 0,30    | 0,73    | 0,26  | 0,46  | 0,54   | 0,29  | 0,26  |
| Ti                             | 0,89  | 0,81  | 0,83  | 0,68  | 0,84  | 0,67  | 0,72  | 0,91  | 0,95  | 0,68   | 1,16   | 0,93   | 1,02    | 0,84    | 0,82  | 0,82  | 0,86   | 0,38  | 0,92  |
| P                              | 0,41  | 0,43  | 0,41  | 0,42  | 0,42  | 0,58  | 0,59  | 0,43  | 0,53  | 1,46   | 0,47   | 0,46   | 0,75    | 0,27    | 0,63  | 0,42  | 0,41   | 0,65  | 0,46  |
| As (ppm)                       | 239   | 264   | 266   | 256   | 225   | 405   | 321   | 242   | 336   | 459    | 339    | 214    | 251     | 125     | 373   | 258   | 238    | 473   | 318   |
| Ba                             | 1263  | 1473  | 1482  | 1237  | 1246  | 1360  | 972   | 1583  | 1602  | 2332   | 1766   | 1643   | 1772    | 1528    | 1368  | 2022  | 1649   | 1004  | 1558  |
| Ce                             | 491   | 529   | 624   | 428   | 579   | 541   | 422   | 587   | 667   | 804    | 910    | 686    | 903     | 415     | 631   | 1025  | 825    | 834   | 885   |
| Co                             | 4023  | 3570  | 3448  | 2400  | 2686  | 4556  | 2378  | 3270  | 4651  | 5295   | 8705   | 4426   | 6004    | 3113    | 7718  | 2289  | 2462   | 6380  | 7249  |
| Cr                             | -     | -     | -     | -     | 43    | 59    | 56    | 54    | 31    | 57     | 56     | 84     | 38      | 220     | 39    | 30    | 31     | 318   | 21    |
| Cu                             | 954   | 685   | 550   | 627   | 714   | 422   | 451   | 931   | 594   | 788    | 800    | 1455   | 1156    | 1529    | 435   | 925   | 689    | 340   | 461   |
| La                             | 191   | 209   | 223   | 171   | 179   | 253   | 185   | 209   | 286   | 229    | 272    | 207    | 230     | 130     | 275   | 265   | 228    | 168   | 295   |
| Mo                             | 297   | 372   | 362   | 269   | 287   | 521   | 263   | 308   | 565   | 500    | 527    | 371    | 516     | 272     | 600   | 568   | 411    | 368   | 726   |
| Nb                             | 64    | 58    | 58    | 50    | 45    | 69    | 48    | 57    | 64    | 61     | 85     | 73     | 73      | 58      | 67    | 49    | 53     | 31    | 49    |
| Nd                             | 117   | 133   | 142   | 110   | 107   | 142   | 107   | 126   | 164   | 132    | 148    | 145    | 129     | 92      | 170   | 186   | 155    | 123   | 167   |
| Ni                             | 2749  | 2761  | 2502  | 1851  | 2460  | 2828  | 2116  | 2336  | 3133  | 4683   | 5375   | 4932   | 5182    | 6106    | 4515  | 2796  | 2202   | 5221  | 4629  |
| Pb                             | 1130  | 1363  | 1251  | 1064  | 1298  | 2360  | 1462  | 1255  | 1979  | 1871   | 2518   | 1561   | 2136    | 1514    | 2563  | 1350  | 1169   | 1009  | 2075  |
| Sr                             | 1259  | 1349  | 1326  | 1155  | 1309  | 1802  | 1432  | 1434  | 1849  | 1601   | 1770   | 1456   | 1635    | 923     | 1868  | 1513  | 1317   | 1288  | 1916  |
| Tl                             | 82    | 78    | 60    | 38    | 42    | 80    | 36    | 54    | 104   | 241    | 229    | 95     | 222     | 128     | 135   | 77    | 62     | 100   | 197   |
| V                              | 572   | 661   | 636   | 591   | 642   | 984   | 756   | 639   | 885   | 833    | 916    | 695    | 771     | 519     | 906   | 872   | 715    | 1146  | 884   |
| Y                              | 149   | 140   | 164   | 150   | 133   | 223   | 164   | 145   | 229   | 170    | 135    | 165    | 183     | 107     | 210   | 117   | 155    | 162   | 201   |
| Zn                             | 577   | 636   | 592   | 582   | 634   | 716   | 603   | 422   | 765   | 972    | 864    | 901    | 901     | 931     | 756   | 855   | 659    | 591   | 711   |
| Zr                             | 513   | 525   | 581   | 554   | 510   | 500   | 403   | 558   | 562   | 337    | 402    | 644    | 483     | 500     | 446   | 623   | 566    | 290   | 425   |
| Pt                             | 0,3   | 0,3   | 0,3   | 0,2   | 0,6   | <0,5  | 0,6   | 0,6   | <0,5  | < 0,5  | 0,9    | < 0,5  | 1,2     | 0,7     | 0,9   | < 0,5 | 0,5    | 0,6   | < 0,5 |

<sup>a</sup> Humidity at 80°C; <sup>b</sup> Loss on ignition at 950°C.

| Sample                        | DR08C | DR10B | DR11Ai-1 | DR11Ai-2 | DR11Ai-3 | DR14F | DR11Ai-4 | DR13Bii | DR13Ci | DR13D | DR14F-1 | DR19K | DR14F-2 | DR14H | DR15A | DR21F | DR18F | DR19K-1 | DR19K-2 |
|-------------------------------|-------|-------|----------|----------|----------|-------|----------|---------|--------|-------|---------|-------|---------|-------|-------|-------|-------|---------|---------|
| H <sub>2</sub> O <sup>a</sup> | 11,2  | 12,27 | 4,04     | 22,24    | 4,18     | 19,66 | 4,48     | 5,9     | 24,09  | 9,16  | 20,01   | 21,51 | 11,5    | 8,64  | 12,73 | 8,03  | 6,18  | 24,52   | 8,38    |
| LOI <sup>b</sup>              | 17,61 | 19,02 | 14,32    | 16       | 16,19    | 18,43 | 15,68    | 17,82   | 18,46  | 15,66 | 18,33   | 17,47 | 18,15   | 15,06 | 17,51 | 15,09 | 18,74 | 17,48   | 17,04   |
| Mn (%)                        | 12,98 | 23,12 | 13,26    | 17,37    | 15,97    | 18,71 | 13,49    | 17,59   | 16,20  | 15,73 | 18,53   | 16,12 | 18,10   | 13,62 | 16,20 | 15,05 | 19,50 | 15,02   | 18,25   |
| Fe                            | 19,37 | 20,96 | 19,25    | 20,95    | 20,93    | 22,49 | 21,64    | 21,93   | 20,12  | 20,96 | 22,28   | 20,60 | 22,83   | 24,06 | 22,02 | 22,54 | 20,24 | 21,19   | 20,57   |
| Fe/Mn                         | 1,49  | 0,91  | 1,45     | 1,21     | 1,31     | 1,20  | 1,60     | 1,25    | 1,24   | 1,33  | 1,20    | 1,28  | 1,26    | 1,77  | 1,36  | 1,50  | 1,04  | 1,41    | 1,13    |
| Si                            | 7,89  | 2,66  | 10,58    | 7,29     | 8,76     | 4,53  | 9,84     | 5,83    | 5,55   | 7,47  | 4,46    | 6,21  | 4,81    | 7,84  | 6,07  | 7,30  | 3,51  | 6,20    | 5,58    |
| Al                            | 2,77  | 0,68  | 2,89     | 1,38     | 1,32     | 1,03  | 1,92     | 1,18    | 1,90   | 2,18  | 1,04    | 2,16  | 1,14    | 2,04  | 1,38  | 2,22  | 1,30  | 2,35    | 1,62    |
| Si/Al                         | 2,85  | 3,91  | 3,66     | 5,28     | 6,64     | 4,40  | 5,13     | 4,94    | 2,92   | 3,43  | 4,29    | 2,88  | 4,22    | 3,84  | 4,40  | 3,29  | 2,70  | 2,64    | 3,44    |
| Mg                            | 1,06  | 1,25  | 1,12     | 1,10     | 1,01     | 1,14  | 1,03     | 1,13    | 1,21   | 1,12  | 1,12    | 1,16  | 1,12    | 1,12  | 1,21  | 1,10  | 1,56  | 1,17    | 1,13    |
| Na                            | 1,77  | 1,48  | 1,67     | 1,50     | 1,49     | 1,48  | 1,65     | 1,56    | 1,65   | 1,72  | 1,47    | 1,62  | 1,59    | 1,63  | 2,10  | 1,67  | 1,48  | 1,62    | 1,65    |
| Ca                            | 4,23  | 2,70  | 2,04     | 2,02     | 1,85     | 2,48  | 1,87     | 2,57    | 3,13   | 2,34  | 2,60    | 2,72  | 2,37    | 1,94  | 2,45  | 2,02  | 3,10  | 3,36    | 2,11    |
| K                             | 0,71  | 0,27  | 0,81     | 0,36     | 0,39     | 0,36  | 0,49     | 0,38    | 0,48   | 0,61  | 0,33    | 0,56  | 0,39    | 0,49  | 0,34  | 0,59  | 0,42  | 0,56    | 0,48    |
| Ti                            | 1,02  | 1,04  | 1,05     | 0,90     | 0,87     | 1,11  | 0,68     | 0,89    | 1,31   | 0,97  | 1,19    | 1,18  | 0,85    | 0,73  | 0,67  | 1,06  | 1,31  | 0,95    | 1,38    |
| P                             | 0,36  | 0,51  | 0,41     | 0,39     | 0,41     | 0,45  | 0,41     | 0,48    | 0,37   | 0,39  | 0,44    | 0,39  | 0,49    | 0,45  | 0,49  | 0,40  | 0,56  | 0,43    | 0,37    |
| As (ppm)                      | 175   | 320   | 200      | 266      | 264      | 279   | 249      | 293     | 188    | 189   | 279     | 201   | 293     | 264   | 292   | 205   | 313   | 209     | 207     |
| Ba                            | 1165  | 1651  | 1967     | 1845     | 1711     | 1956  | 1251     | 1516    | 1254   | 1500  | 1988    | 1261  | 1582    | 1334  | 1249  | 1481  | 1430  | 1072    | 1538    |
| Ce                            | 629   | 768   | 1011     | 979      | 841      | 859   | 490      | 614     | 735    | 616   | 906     | 701   | 601     | 663   | 509   | 700   | 979   | 533     | 871     |
| Co                            | 3645  | 5511  | 1644     | 3323     | 3137     | 3702  | 2163     | 4203    | 5557   | 3191  | 4000    | 4216  | 3361    | 2140  | 2455  | 2987  | 10172 | 3293    | 5127    |
| Cr                            | 28    | 27    | 14       | 26       | 37       | 30    | 41       | 33      | 31     | 34    | 30      | 24    | 25      | 35    | 24    | 28    | 53    | 25      | 28      |
| Cu                            | 1012  | 562   | 896      | 958      | 605      | 858   | 547      | 483     | 1016   | 1436  | 844     | 1172  | 613     | 684   | 545   | 1128  | 690   | 991     | 1329    |
| La                            | 167   | 294   | 236      | 296      | 258      | 297   | 188      | 260     | 230    | 197   | 319     | 244   | 257     | 214   | 232   | 241   | 269   | 233     | 275     |
| Mo                            | 223   | 674   | 392      | 600      | 485      | 520   | 307      | 459     | 240    | 274   | 502     | 271   | 459     | 307   | 426   | 302   | 411   | 243     | 361     |
| Nb                            | 68    | 61    | 52       | 53       | 58       | 70    | 49       | 61      | 84     | 57    | 79      | 71    | 60      | 53    | 42    | 59    | 116   | 69      | 74      |
| Nd                            | 84    | 167   | 146      | 229      | 176      | 200   | 103      | 156     | 114    | 104   | 208     | 139   | 146     | 132   | 145   | 155   | 151   | 132     | 171     |
| Ni                            | 2365  | 3998  | 2520     | 2884     | 2298     | 2840  | 2091     | 2938    | 2663   | 2647  | 2866    | 2649  | 2615    | 1656  | 2301  | 2279  | 3457  | 2280    | 3120    |
| Pb                            | 1059  | 2025  | 942      | 1285     | 1407     | 1720  | 1159     | 1478    | 1024   | 1113  | 1798    | 946   | 1539    | 1231  | 1245  | 1025  | 2217  | 794     | 1179    |
| Sr                            | 1157  | 1984  | 1298     | 1473     | 1428     | 1752  | 1227     | 1621    | 1270   | 1283  | 1707    | 1270  | 1639    | 1261  | 1515  | 1248  | 1637  | 1283    | 1394    |
| Tl                            | 83    | 146   | 64       | 123      | 54       | 112   | 43       | 88      | 95     | 74    | 131     | 99    | 76      | 25    | 31    | 79    | 143   | 77      | 121     |
| V                             | 441   | 874   | 642      | 867      | 817      | 843   | 696      | 774     | 451    | 616   | 830     | 501   | 796     | 742   | 729   | 613   | 743   | 490     | 574     |
| Y                             | 104   | 195   | 159      | 152      | 167      | 162   | 156      | 203     | 159    | 127   | 156     | 156   | 208     | 168   | 175   | 172   | 245   | 166     | 167     |
| Zn                            | 534   | 751   | 792      | 753      | 639      | 777   | 597      | 669     | 553    | 660   | 801     | 543   | 705     | 569   | 591   | 616   | 713   | 517     | 603     |
| Zr                            | 537   | 541   | 564      | 599      | 576      | 622   | 572      | 579     | 651    | 589   | 629     | 626   | 638     | 604   | 569   | 614   | 534   | 643     | 657     |
| Pt                            | < 0,5 | < 0,5 | 0,7      | < 0,5    | < 0,5    | 0,5   | 0,5      | < 0,5   | 0,7    | < 0,5 | 0,7     | 0,7   | < 0,5   | < 0,5 | < 0,5 | 0,7   | 0,9   | < 0,5   | < 0,5   |

**Table S1.** (continued)

<sup>a</sup>Humidity at 80°C; <sup>b</sup>Loss on ignition at 950°C.

| Sample                        | DR21Bii<br>i | DR38<br>C | DR21F-<br>1 | DR21F-<br>2 | DR22<br>A | DR29<br>F | DR38C-<br>1 | DR38C-<br>2 | DR41A<br>i | DR42<br>B | DR48-<br>021 | DR53-<br>008 | DR54-<br>009 | DW4998<br>D | DW4998<br>E | DW5067<br>B | DW5070<br>A | DW507<br>3 | DW5086<br>B |
|-------------------------------|--------------|-----------|-------------|-------------|-----------|-----------|-------------|-------------|------------|-----------|--------------|--------------|--------------|-------------|-------------|-------------|-------------|------------|-------------|
| H <sub>2</sub> O <sup>a</sup> | 5,58         | 3,94      | 2,87        | 4,37        | 5,92      | 8,67      | 6,33        | 8,99        | 19,16      | 8,75      | 6,38         | 9,82         | 13,9         | 0,6         | 2,61        | 5,48        | 17,4        | 8,88       | 8,19        |
| LOI <sup>b</sup>              | 16,01        | 22,07     | 18,92       | 16,86       | 17,2      | 17,32     | 19,98       | 19,75       | 15,39      | 18,28     | 15,44        | 19,72        | 18,96        | 21,46       | 21,35       | 22,16       | 18,94       | 20,88      | 19,44       |
| Mn (%)                        | 15,39        | 19,68     | 16,62       | 14,10       | 17,09     | 18,65     | 21,09       | 20,17       | 13,72      | 19,96     | 16,47        | 22,21        | 22,72        | 28,96       | 14,03       | 22,20       | 20,48       | 22,65      | 20,35       |
| Fe                            | 18,85        | 19,80     | 22,10       | 23,67       | 20,45     | 22,05     | 20,95       | 20,32       | 20,61      | 23,89     | 19,64        | 21,22        | 18,66        | 1,82        | 13,67       | 19,82       | 19,74       | 20,58      | 20,99       |
| Fe/Mn                         | 1,22         | 1,01      | 1,33        | 1,68        | 1,20      | 1,18      | 0,99        | 1,01        | 1,50       | 1,20      | 1,19         | 0,96         | 0,82         | 0,06        | 0,97        | 0,89        | 0,96        | 0,91       | 1,03        |
| Si                            | 8,89         | 3,47      | 5,75        | 7,15        | 7,04      | 4,94      | 2,94        | 3,88        | 8,78       | 2,54      | 8,40         | 2,67         | 3,33         | 0,35        | 1,07        | 0,90        | 4,04        | 0,86       | 3,65        |
| Al                            | 2,56         | 0,92      | 1,57        | 2,21        | 1,95      | 1,22      | 0,90        | 0,97        | 2,85       | 0,92      | 1,73         | 0,66         | 1,02         | 0,28        | 1,99        | 0,50        | 1,35        | 0,78       | 1,04        |
| Si/Al                         | 3,47         | 3,77      | 3,66        | 3,24        | 3,61      | 4,05      | 3,27        | 4,00        | 3,08       | 2,76      | 4,86         | 4,05         | 3,26         | 1,25        | 0,54        | 1,80        | 2,99        | 1,10       | 3,51        |
| Mg                            | 1,17         | 1,13      | 1,04        | 1,10        | 1,16      | 1,12      | 1,19        | 1,15        | 1,31       | 1,33      | 1,12         | 1,20         | 1,32         | 1,25        | 3,58        | 1,50        | 1,25        | 1,62       | 1,29        |
| Na                            | 2,05         | 1,35      | 1,52        | 1,64        | 1,66      | 1,47      | 1,39        | 1,49        | 1,77       | 1,25      | 1,74         | 1,33         | 1,55         | 0,30        | 0,42        | 1,04        | 1,54        | 1,08       | 1,45        |
| Ca                            | 1,89         | 2,91      | 1,96        | 1,93        | 2,15      | 2,33      | 2,61        | 3,20        | 2,07       | 3,05      | 2,14         | 2,60         | 2,95         | 17,79       | 13,52       | 4,73        | 2,60        | 3,68       | 2,40        |
| K                             | 0,81         | 0,32      | 0,47        | 0,59        | 0,53      | 0,41      | 0,32        | 0,37        | 0,68       | 0,28      | 0,47         | 0,32         | 0,32         | 0,13        | 0,20        | 0,19        | 0,37        | 0,20       | 0,37        |
| Ti                            | 0,86         | 1,19      | 1,10        | 0,79        | 0,74      | 1,10      | 1,34        | 1,05        | 0,82       | 0,79      | 1,00         | 0,85         | 0,90         | 0,05        | 0,17        | 0,66        | 1,08        | 0,86       | 1,12        |
| P                             | 0,32         | 0,42      | 0,39        | 0,44        | 0,40      | 0,46      | 0,42        | 0,45        | 0,38       | 0,60      | 0,38         | 0,51         | 0,51         | 1,88        | 1,97        | 0,55        | 0,44        | 0,63       | 0,49        |
| As<br>(ppm)                   | 149          | 262       | 223         | 227         | 216       | 272       | 277         | 277         | 201        | 387       | 228          | 338          | 309          | 63          | 260         | 476         | 250         | 460        | 313         |
| Ba                            | 1484         | 1584      | 1666        | 1217        | 1474      | 1762      | 1882        | 1377        | 1192       | 2150      | 1284         | 1677         | 1135         | 4151        | 869         | 1478        | 1537        | 1643       | 1553        |
| Ce                            | 601          | 964       | 778         | 538         | 498       | 771       | 1122        | 749         | 492        | 1080      | 740          | 905          | 607          | 86          | 221         | 709         | 728         | 814        | 712         |
| Co                            | 2894         | 6172      | 3436        | 2273        | 2310      | 3805      | 6776        | 5745        | 2185       | 5371      | 4455         | 5531         | 6732         | 405         | 1409        | 6130        | 5524        | 6410       | 6473        |
| Cr                            | 32           | 25        | 27          | 27          | 25        | 25        | 27          | 23          | 43         | 78        | 36           | 24           | 37           | <10         | 35          | 60          | 30          | 70         | 43          |
| Cu                            | 2333         | 630       | 949         | 1045        | 1245      | 612       | 702         | 576         | 1306       | 586       | 999          | 404          | 476          | 108         | 655         | 346         | 1013        | 487        | 647         |
| La                            | 148          | 300       | 279         | 226         | 187       | 265       | 332         | 295         | 173        | 271       | 239          | 287          | 257          | 74          | 80          | 268         | 273         | 229        | 257         |
| Mo                            | 281          | 438       | 406         | 274         | 354       | 451       | 499         | 460         | 220        | 639       | 362          | 703          | 581          | 82          | 410         | 655         | 450         | 621        | 500         |
| Nb                            | 48           | 78        | 63          | 52          | 44        | 67        | 91          | 68          | 48         | 60        | 70           | 55           | 58           | 7           | 18          | 58          | 62          | 78         | 76          |
| Nd                            | 81           | 205       | 202         | 151         | 98        | 150       | 215         | 179         | 104        | 159       | 151          | 177          | 152          | 30          | 30          | 165         | 170         | 117        | 119         |
| Ni                            | 3284         | 3314      | 2532        | 1944        | 3556      | 2948      | 3514        | 3436        | 3149       | 3169      | 3001         | 3509         | 4599         | 736         | 6936        | 4497        | 4057        | 4958       | 4083        |
| Pb                            | 956          | 1877      | 1231        | 897         | 1087      | 1652      | 2171        | 1716        | 879        | 2236      | 1106         | 2006         | 1635         | 171         | 322         | 2976        | 1539        | 3091       | 3035        |
| Sr                            | 1154         | 1666      | 1414        | 1231        | 1351      | 1649      | 1750        | 1702        | 1097       | 1956      | 1321         | 1864         | 1727         | 1119        | 719         | 1965        | 1590        | 1864       | 1769        |
| Tl                            | 74           | 139       | 86          | 57          | 88        | 93        | 178         | 114         | 76         | 161       | 112          | 148          | 131          | 43          | 78          | 186         | 155         | 205        | 201         |
| V                             | 629          | 761       | 688         | 594         | 646       | 752       | 852         | 756         | 510        | 1144      | 631          | 954          | 779          | 289         | 796         | 1246        | 695         | 1279       | 944         |
| Y                             | 69           | 191       | 193         | 186         | 146       | 208       | 177         | 211         | 133        | 121       | 154          | 205          | 172          | 68          | 74          | 200         | 152         | 172        | 168         |
| Zn                            | 662          | 657       | 645         | 563         | 715       | 720       | 726         | 644         | 670        | 853       | 547          | 712          | 618          | 161         | 459         | 654         | 491         | 704        | 729         |
| Zr                            | 505          | 591       | 664         | 642         | 574       | 658       | 570         | 615         | 569        | 428       | 584          | 498          | 498          | 39          | 91          | 291         | 547         | 345        | 342         |
| Pt                            | 0,7          | 0,9       | 0,7         | < 0,5       | < 0,5     | < 0,5     | 1,0         | < 0,5       | < 0,5      | < 0,5     | 1,2          | < 0,5        | 0,6          | < 0,5       | < 0,5       | < 0,5       | 0,6         | 0,9        | 0,7         |

**Table S1.** (continued)

<sup>a</sup> Humidity at 80°C; <sup>b</sup> Loss on ignition at 950°C.

| Sample                        | DW508<br>7 | DW5089<br>B | DW5090<br>B | DW5091<br>A | DW77<br>2 | DW77<br>4 | E-<br>DR08B | DW778<br>B | DW778<br>D | DW778D<br>2 | DW248<br>2 | E-DR08B-<br>1 | E-DR08B-<br>2 | E-DR08B-<br>3 | GO14<br>D | GO15<br>D | GO16<br>D | GO302<br>D | GO18<br>D |
|-------------------------------|------------|-------------|-------------|-------------|-----------|-----------|-------------|------------|------------|-------------|------------|---------------|---------------|---------------|-----------|-----------|-----------|------------|-----------|
| H <sub>2</sub> O <sup>a</sup> | 14,69      | 8,04        | 14,64       | 13,39       | 8,18      | 9,86      | 7,99        | 0,42       | 0,36       | 0,82        | 1,59       | 5,67          | 7,86          | 5,51          | 22,26     | 17,65     | 20,54     | 4,94       | 4,68      |
| LOI <sup>b</sup>              | 20,28      | 20,55       | 22,69       | 18,18       | 20,13     | 21,12     | 16,04       | 17,34      | 17,76      | 17,36       | 18,91      | 17,61         | 17,54         | 15,57         | 20,89     | 22,34     | 18,19     | 15,72      | 20,54     |
| Mn (%)                        | 20,37      | 22,65       | 22,21       | 18,77       | 26,90     | 23,69     | 16,05       | 50,38      | 48,37      | 48,82       | 38,44      | 18,03         | 20,45         | 14,74         | 21,58     | 16,03     | 18,00     | 15,78      | 20,39     |
| Fe                            | 19,20      | 19,23       | 19,06       | 19,43       | 17,38     | 17,43     | 20,66       | 1,27       | 1,59       | 1,28        | 2,80       | 19,36         | 20,10         | 21,22         | 20,71     | 19,63     | 18,53     | 20,67      | 21,64     |
| Fe/Mn                         | 0,94       | 0,85        | 0,86        | 1,04        | 0,65      | 0,74      | 1,29        | 0,03       | 0,03       | 0,03        | 0,07       | 1,07          | 0,98          | 1,44          | 0,96      | 1,22      | 1,03      | 1,31       | 1,06      |
| Si                            | 4,11       | 2,50        | 2,04        | 5,43        | 1,25      | 1,65      | 7,64        | 0,49       | 0,53       | 0,51        | 0,29       | 6,86          | 5,49          | 8,20          | 2,11      | 4,57      | 6,23      | 7,74       | 2,69      |
| Al                            | 1,21       | 0,97        | 0,89        | 1,85        | 0,69      | 0,90      | 1,89        | 0,25       | 0,27       | 0,23        | 0,57       | 1,52          | 0,97          | 2,25          | 0,85      | 1,22      | 2,07      | 2,11       | 0,69      |
| Si/Al                         | 3,40       | 2,58        | 2,29        | 2,94        | 1,81      | 1,83      | 4,04        | 1,96       | 1,96       | 2,22        | 0,51       | 4,51          | 5,66          | 3,64          | 2,48      | 3,75      | 3,01      | 3,67       | 3,90      |
| Mg                            | 1,28       | 1,41        | 1,37        | 1,34        | 1,59      | 1,74      | 1,14        | 0,99       | 0,92       | 0,80        | 2,31       | 1,15          | 1,21          | 1,13          | 1,30      | 1,59      | 1,57      | 1,05       | 1,26      |
| Na                            | 1,54       | 1,54        | 1,25        | 1,62        | 1,30      | 1,18      | 1,68        | 0,42       | 0,32       | 0,21        | 0,84       | 1,70          | 1,86          | 1,72          | 1,31      | 1,62      | 1,74      | 1,91       | 1,57      |
| Ca                            | 2,35       | 2,71        | 2,95        | 2,62        | 3,13      | 4,35      | 2,40        | 6,21       | 7,54       | 8,14        | 8,67       | 2,30          | 2,50          | 2,42          | 2,86      | 4,22      | 2,62      | 2,33       | 2,61      |
| K                             | 0,37       | 0,27        | 0,26        | 0,40        | 0,28      | 0,22      | 0,41        | 0,20       | 0,13       | 0,11        | 0,37       | 0,39          | 0,33          | 0,45          | 0,29      | 0,18      | 0,48      | 0,47       | 0,26      |
| Ti                            | 1,10       | 0,89        | 0,88        | 0,77        | 0,80      | 0,75      | 0,86        | 0,05       | 0,08       | 0,06        | 0,10       | 1,03          | 1,16          | 0,75          | 1,03      | 0,83      | 0,61      | 0,98       | 0,65      |
| P                             | 0,47       | 0,52        | 0,58        | 0,52        | 0,50      | 0,55      | 0,47        | 0,53       | 0,41       | 0,37        | 1,00       | 0,41          | 0,47          | 0,49          | 0,51      | 0,48      | 0,51      | 0,41       | 0,55      |
| As<br>(ppm)                   | 269        | 313         | 326         | 260         | 412       | 402       | 279         | 71         | 72         | 59          | 89         | 269           | 293           | 277           | 325       | 289       | 255       | 244        | 371       |
| Ba                            | 1661       | 1361        | 1547        | 1258        | 1341      | 1134      | 1423        | 8460       | 4946       | 3339        | 11719      | 1610          | 1674          | 1319          | 1846      | 1003      | 1218      | 1679       | 1431      |
| Ce                            | 801        | 585         | 759         | 494         | 673       | 576       | 599         | 148        | 112        | 81          | 275        | 868           | 808           | 471           | 949       | 467       | 387       | 701        | 554       |
| Co                            | 6096       | 6389        | 6796        | 4232        | 9774      | 8738      | 3756        | 514        | 898        | 655         | 1148       | 5074          | 6010          | 2959          | 6547      | 4310      | 3012      | 3145       | 4466      |
| Cr                            | 57         | 42          | 44          | 52          | 46        | 41        | 41          | <10        | <10        | <10         | 12         | 41            | 36            | 40            | 52        | 47        | 70        | 34         | 49        |
| Cu                            | 1126       | 822         | 632         | 898         | 424       | 348       | 598         | 283        | 242        | 187         | 295        | 802           | 657           | 537           | 938       | 532       | 1034      | 547        | 530       |
| La                            | 261        | 249         | 257         | 196         | 280       | 303       | 226         | 88         | 105        | 96          | 88         | 281           | 301           | 193           | 288       | 246       | 185       | 251        | 268       |
| Mo                            | 469        | 560         | 581         | 424         | 713       | 635       | 401         | 168        | 141        | 128         | 228        | 472           | 560           | 354           | 587       | 354       | 389       | 390        | 620       |
| Nb                            | 69         | 64          | 67          | 55          | 66        | 68        | 63          | 5          | 10         | 7           | 15         | 76            | 71            | 56            | 77        | 66        | 43        | 59         | 47        |
| Nd                            | 161        | 136         | 154         | 100         | 180       | 194       | 129         | 30         | 30         | 30          | 30         | 183           | 192           | 106           | 181       | 151       | 102       | 163        | 146       |
| Ni                            | 4262       | 4620        | 4455        | 4016        | 5972      | 5086      | 2976        | 1095       | 1432       | 1178        | 4138       | 3585          | 3817          | 2642          | 4147      | 2518      | 5133      | 2445       | 3225      |
| Pb                            | 1845       | 2118        | 2397        | 1576        | 3268      | 3153      | 1535        | 219        | 359        | 257         | 349        | 1859          | 1834          | 1411          | 2395      | 1552      | 1143      | 1243       | 2330      |
| Sr                            | 1611       | 1775        | 1786        | 1484        | 2004      | 2059      | 1481        | 1858       | 1440       | 1261        | 2656       | 1537          | 1733          | 1438          | 1808      | 1556      | 1240      | 1517       | 1860      |
| Tl                            | 146        | 176         | 221         | 115         | 213       | 169       | 96          | 77         | 75         | 61          | 141        | 156           | 173           | 63            | 221       | 48        | 125       | 58         | 86        |
| V                             | 794        | 832         | 945         | 746         | 1065      | 995       | 753         | 271        | 263        | 214         | 525        | 797           | 845           | 729           | 938       | 640       | 682       | 699        | 957       |
| Y                             | 146        | 185         | 172         | 162         | 206       | 233       | 173         | 62         | 65         | 61          | 41         | 155           | 180           | 183           | 134       | 182       | 150       | 170        | 227       |
| Zn                            | 821        | 773         | 788         | 507         | 660       | 612       | 674         | 182        | 201        | 111         | 589        | 698           | 710           | 664           | 831       | 562       | 833       | 651        | 740       |
| Zr                            | 539        | 512         | 426         | 524         | 342       | 347       | 511         | 73         | 73         | 61          | 73         | 494           | 521           | 513           | 430       | 486       | 437       | 593        | 452       |
| Pt                            | < 0,5      | 0,7         | 1,0         | < 0,5       | 1,3       | 0,7       | < 0,5       | < 0,5      | < 0,5      | < 0,5       | < 0,5      | 1,0           | 0,7           | < 0,5         | < 0,5     | < 0,5     | 0,8       | < 0,5      | < 0,5     |

**Table S1.** (continued)

<sup>a</sup>Humidity at 80°C; <sup>b</sup>Loss on ignition at 950°C.

| Sample                        | GO20<br>2 | GO20<br>9 | GO20<br>D | GO327<br>D | GO302D-<br>1 | GO302D-<br>2 | GO31<br>0 | GO314D1<br>0 | GO316D3<br>1 | GO350-<br>D6 | GO317D1<br>0 | GO32<br>0 | GO321D<br>2 | GO322D<br>4 | GO323D<br>4 | GO325D<br>2 | GO327D-<br>1 | GO327D-<br>2 | GO327D-<br>3 |
|-------------------------------|-----------|-----------|-----------|------------|--------------|--------------|-----------|--------------|--------------|--------------|--------------|-----------|-------------|-------------|-------------|-------------|--------------|--------------|--------------|
| H <sub>2</sub> O <sup>a</sup> | 22,57     | 20,21     | 21,31     | 15,06      | 8,89         | 6,38         | 16,57     | -            | -            | 12,46        |              | 11,55     | -           | -           | -           | -           | 9,76         | 4,88         | 18,71        |
| LOI <sup>b</sup>              | 17,93     | 20,7      | 19,51     | 13,96      | 18,63        | 15,4         | 14,38     | -            | -            | 18,68        |              | 16,76     | -           | -           | -           | -           | 15,86        | 14,27        | 14,36        |
| Mn (%)                        | 18,19     | 17,77     | 20,85     | 12,41      | 16,61        | 15,34        | 10,77     | 7,73         | 11,36        | 17,25        | 12,06        | 18,37     | 13,24       | 16,97       | 10,92       | 11,83       | 13,11        | 13,96        | 12,71        |
| Fe                            | 19,85     | 21,74     | 21,16     | 21,03      | 19,61        | 22,35        | 18,49     | 18,97        | 21,13        | 20,28        | 23,99        | 20,75     | 22,49       | 22,91       | 22,03       | 22,43       | 23,86        | 22,44        | 22,90        |
| Fe/Mn                         | 1,09      | 1,22      | 1,01      | 1,69       | 1,18         | 1,46         | 1,72      | 2,45         | 1,86         | 1,18         | 1,99         | 1,13      | 1,70        | 1,35        | 2,02        | 1,90        | 1,82         | 1,61         | 1,80         |
| Si                            | 6,89      | 4,53      | 3,06      | 11,96      | 6,64         | 7,50         | 10,78     | 13,67        | 10,59        | 6,41         | 8,72         | 6,08      | 8,92        | 7,02        | 14,09       | 11,75       | 9,03         | 9,84         | 10,53        |
| Al                            | 1,26      | 1,23      | 0,86      | 1,97       | 1,81         | 2,07         | 4,06      | 4,57         | 3,59         | 1,62         | 2,86         | 1,93      | 3,03        | 1,79        | 2,13        | 2,72        | 1,36         | 1,57         | 1,58         |
| Si/Al                         | 5,47      | 3,68      | 3,56      | 6,07       | 3,67         | 3,62         | 2,66      | 2,99         | 2,95         | 3,96         | 3,05         | 3,15      | 2,94        | 3,92        | 6,61        | 4,32        | 6,64         | 6,27         | 6,66         |
| Mg                            | 1,08      | 1,19      | 1,42      | 1,13       | 1,06         | 1,07         | 1,52      | 2,22         | 1,35         | 1,13         | 1,37         | 1,33      | 1,43        | 1,14        | 1,03        | 1,04        | 1,07         | 1,15         | 1,06         |
| Na                            | 1,57      | 1,42      | 1,47      | 1,71       | 1,71         | 1,85         | 2,23      | 1,66         | 1,75         | 1,54         | 1,81         | 1,73      | 1,66        | 1,29        | 1,28        | 1,45        | 1,45         | 1,54         | 1,52         |
| Ca                            | 2,03      | 2,45      | 2,75      | 1,54       | 2,47         | 2,23         | 3,00      | 3,94         | 2,05         | 1,97         | 2,30         | 2,27      | 1,90        | 2,12        | 1,30        | 1,50        | 1,69         | 1,74         | 1,53         |
| K                             | 0,39      | 0,35      | 0,24      | 0,44       | 0,45         | 0,44         | 0,74      | 0,64         | 1,02         | 0,53         | 0,46         | 0,46      | 0,58        | 0,48        | 0,44        | 0,55        | 0,39         | 0,37         | 0,38         |
| Ti                            | 0,95      | 0,76      | 0,93      | 0,69       | 1,06         | 0,81         | 0,90      | 0,82         | 0,78         | 1,01         | 0,98         | 0,77      | 0,85        | 1,00        | 0,67        | 0,87        | 0,62         | 0,66         | 0,72         |
| P                             | 0,39      | 0,53      | 0,57      | 0,36       | 0,39         | 0,47         | 0,32      | 0,30         | 0,38         | 0,37         | 0,39         | 0,42      | 0,37        | 0,41        | 0,36        | 0,34        | 0,45         | 0,38         | 0,41         |
| As<br>(ppm)                   | 252       | 328       | 366       | 253        | 234          | 272          | 144       | 192          | 211          | 219          | 224          | 249       | 231         | 268         | 252         | 207         | 287          | 281          | 279          |
| Ba                            | 1564      | 1462      | 1216      | 1513       | 1745         | 1574         | 885       | 1102         | 1185         | 1725         | 1218         | 972       | 1120        | 1518        | 1297        | 1385        | 1526         | 1676         | 1708         |
| Ce                            | 868       | 514       | 648       | 998        | 824          | 545          | 406       | 342          | 348          | 885          | 477          | 588       | 534         | 686         | 808         | 601         | 803          | 1007         | 1093         |
| Co                            | 4283      | 3965      | 7001      | 2573       | 3711         | 2391         | 1765      | 1211         | 1642         | 3236         | 1980         | 2604      | 2228        | 3637        | 2437        | 2073        | 2268         | 2777         | 2521         |
| Cr                            | 25        | 28        | 44        | 71         | 25           | 32           | 48        | -            | -            | 25           | -            | 35        | -           | -           | -           | -           | 63           | 56           | 58           |
| Cu                            | 915       | 444       | 452       | 898        | 560          | 502          | 973       | 434          | 695          | 990          | 555          | 648       | 824         | 959         | 708         | 773         | 574          | 919          | 658          |
| La                            | 268       | 245       | 310       | 224        | 282          | 216          | 174       | 154          | 156          | 260          | 178          | 244       | 179         | 230         | 167         | 165         | 211          | 259          | 244          |
| Mo                            | 518       | 491       | 457       | 422        | 394          | 387          | 156       | 179          | 208          | 442          | 164          | 491       | 227         | 350         | 279         | 247         | 393          | 577          | 427          |
| Nb                            | 57        | 57        | 70        | 52         | 66           | 49           | 41        | 33           | 37           | 55           | 47           | 29        | 45          | 57          | 57          | 52          | 49           | 50           | 50           |
| Nd                            | 186       | 146       | 193       | 175        | 201          | 119          | 121       | 110          | 114          | 165          | 135          | 188       | 140         | 161         | 125         | 152         | 125          | 209          | 173          |
| Ni                            | 3111      | 2858      | 3737      | 2039       | 2687         | 2086         | 1588      | 855          | 1573         | 2876         | 1161         | 2750      | 1823        | 2425        | 1601        | 1313        | 1647         | 2295         | 1676         |
| Pb                            | 1288      | 1682      | 2382      | 1085       | 1351         | 1091         | 469       | 637          | 823          | 1306         | 788          | 761       | 795         | 1075        | 1058        | 957         | 1211         | 1329         | 1165         |
| Sr                            | 1445      | 1679      | 1747      | 1133       | 1535         | 1506         | 962       | 819          | 1061         | 1375         | 1109         | 1286      | 1002        | 1364        | 998         | 955         | 1305         | 1281         | 1229         |
| Tl                            | 108       | 80        | 120       | 54         | 76           | 36           | 48        | 8            | 28           | 93           | 13           | 69        | 38          | 52          | 24          | 12          | 8            | 69           | 19           |
| V                             | 721       | 844       | 892       | 742        | 686          | 767          | 438       | 534          | 519          | 669          | 467          | 666       | 524         | 619         | 592         | 518         | 778          | 880          | 788          |
| Y                             | 159       | 215       | 225       | 109        | 163          | 183          | 130       | 125          | 142          | 164          | 153          | 164       | 143         | 153         | 114         | 138         | 169          | 113          | 132          |
| Zn                            | 601       | 706       | 738       | 654        | 641          | 668          | 417       | 426          | 556          | 661          | 475          | 449       | 441         | 561         | 562         | 453         | 659          | 525          | 652          |
| Zr                            | 553       | 505       | 502       | 549        | 602          | 564          | 478       | 485          | 513          | 547          | 657          | 416       | 578         | 641         | 583         | 599         | 616          | 588          | 575          |
| Pt                            | 0,5       | < 0,5     | 0,8       | < 0,5      | n.m.         | < 0,5        | < 0,5     | < 0,2        | 0,3          | < 0,5        | 0,3          | < 0,5     | -           | 0,4         | 0,3         | -           | < 0,5        | < 0,5        | < 0,5        |

**Table S1.** (continued)<sup>a</sup> Humidity at 80°C; <sup>b</sup> Loss on ignition at 950°C.

| Sample                        | GO327D-4 | GO338D2 | GO347D | GO348D6 | GO350-D6-1 | GO350-D6-2 | GO350-D6-3 | GO3D  | V-DR08B |
|-------------------------------|----------|---------|--------|---------|------------|------------|------------|-------|---------|
| H <sub>2</sub> O <sup>a</sup> | 3,84     | -       | -      | 9,1     | 5,07       | 11,48      | 9,26       | 21,3  | 6,01    |
| LOI <sup>b</sup>              | 0        | -       | -      | 18,28   | 14         | 15,5       | 21,03      | 18,72 | 15,8    |
| Mn (%)                        | 13,83    | 18,70   | 19,57  | 21,49   | 19,64      | 17,83      | 19,45      | 17,15 | 15,26   |
| Fe                            | 22,95    | 22,75   | 18,73  | 20,68   | 22,32      | 21,75      | 21,04      | 22,75 | 22,07   |
| Fe/Mn                         | 1,66     | 1,22    | 0,96   | 0,96    | 1,14       | 1,22       | 1,08       | 1,33  | 1,45    |
| Si                            | 9,64     | 4,74    | 5,52   | 3,17    | 4,70       | 6,57       | 4,06       | 4,88  | 7,41    |
| Al                            | 1,43     | 1,27    | 1,57   | 1,23    | 0,96       | 1,49       | 1,01       | 1,14  | 2,12    |
| Si/Al                         | 6,74     | 3,74    | 3,51   | 2,58    | 4,90       | 4,41       | 4,02       | 4,28  | 3,50    |
| Mg                            | 1,11     | 1,36    | 1,27   | 1,35    | 1,28       | 1,05       | 1,07       | 1,16  | 1,08    |
| Na                            | 1,41     | 1,15    | 1,56   | 1,42    | 1,94       | 1,65       | 1,42       | 1,54  | 1,68    |
| Ca                            | 1,84     | 2,49    | 3,65   | 2,80    | 3,72       | 2,07       | 2,16       | 2,30  | 2,27    |
| K                             | 0,37     | 0,36    | 0,46   | 0,35    | 0,23       | 0,44       | 0,37       | 0,38  | 0,56    |
| Ti                            | 0,71     | 1,10    | 0,94   | 0,99    | 0,72       | 1,13       | 0,89       | 0,87  | 1,04    |
| P                             | 0,44     | 0,47    | 0,86   | 0,52    | 0,79       | 0,40       | 0,42       | 0,47  | 0,41    |
| As (ppm)                      | 281      | 296     | 236    | 340     | 326        | 236        | 262        | 292   | 229     |
| Ba                            | 1821     | 1687    | 1511   | 2230    | 1400       | 1854       | 1600       | 1576  | 1692    |
| Ce                            | 997      | 652     | 566    | 1184    | 715        | 1056       | 774        | 750   | 750     |
| Co                            | 2935     | 5708    | 4119   | 5349    | 2493       | 3466       | 3369       | 4038  | 2677    |
| Cr                            | 73       | -       | -      | 32      | 29         | 24         | 24         | 68    | 33      |
| Cu                            | 928      | 867     | 878    | 705     | 729        | 761        | 682        | 553   | 734     |
| La                            | 239      | 240     | 210    | 267     | 257        | 295        | 272        | 245   | 231     |
| Mo                            | 544      | 377     | 438    | 615     | 478        | 488        | 567        | 441   | 381     |
| Nb                            | 51       | 81      | 46     | 66      | 52         | 58         | 47         | 57    | 61      |
| Nd                            | 182      | 136     | 120    | 147     | 208        | 209        | 165        | 150   | 138     |
| Ni                            | 2283     | 3477    | 3654   | 3789    | 2719       | 2639       | 2725       | 2485  | 2631    |
| Pb                            | 1447     | 1830    | 1528   | 2098    | 1335       | 1471       | 1446       | 1548  | 1503    |
| Sr                            | 1313     | 1491    | 1490   | 1929    | 1545       | 1523       | 1563       | 1542  | 1392    |
| Tl                            | 61       | 98      | 103    | 158     | 54         | 86         | 94         | 65    | 90      |
| V                             | 954      | 698     | 662    | 960     | 770        | 713        | 792        | 761   | 701     |
| Y                             | 103      | 186     | 191    | 151     | 155        | 175        | 217        | 191   | 108     |
| Zn                            | 890      | 725     | 631    | 831     | 640        | 675        | 625        | 708   | 733     |
| Zr                            | 562      | 590     | 504    | 524     | 595        | 567        | 540        | 569   | 607     |
| Pt                            | 0,6      | 0,5     | < 0,2  | -       | 0,6        | < 0,5      | < 0,5      | < 0,5 | < 0,5   |
